# Supplementary material for: Joint metabolomic and transcriptomic analysis identify unique phenolic acid and flavonoid compounds associated with resistance to fusarium wilt in cucumber (Cucumis sativus L.)
Source: Front Plant Sci. 2024 Aug 7;15:1447860. doi: 10.3389/fpls.2024.1447860 (PMC11335689; doi:10.3389/fpls.2024.1447860)
Supplement: Supplementary file 2 [file Table_1.xlsx]

## Sheet: Table S1 
Table S1. Differentially accumulated metabolites (DAMs) in four comparisons of four samples.
#	Index	Formula	Compounds	Class I	Class II	CAS	Level	NS4d-1	NS4d-2	NS4d-3	NR4d-1	NR4d-2	NR4d-3	VIP	P-value	Fold_Change	Log2FC	Type
1	Zmyn004548	C18H28O3	12-Oxo-phytodienoic acid	Lipids	Free fatty acids	85551-10-6	1	57304.9	81469.8	93997.4	47108.7	38081.4	22131.2	1.44847	0.0389727	0.461058	-1.11698	down
2	Zmdn007764	C15H10O5	isoemodin	Quinones	Anthraquinone	-	1	12566.4	73911.4	140184	7487.5	6447.57	4744.32	1.43395	0.200596	0.082411	-3.60102	down
3	MWS2070	C10H12O3	Propyl 4-hydroxybenzoate	Phenolic acids	Phenolic acids	94-13-3	3	8108.59	6414.12	5574.27	19460.6	15416.1	6876.55	1.22629	0.187038	2.07759	1.05491	up
4	pmp000579	C22H22O11	Diosmetin-7-O-galactoside*	Flavonoids	Flavones	-	3	46465.9	48361.6	62053.3	26889.2	24535.3	15155.8	1.58938	0.00972959	0.424401	-1.2365	down
5	Lmmn003323	C16H32O3	2-Hydroxyhexadecanoic acid	Organic acids	Organic acids	764-67-0	2	1.79578e+06	1.57831e+06	2.44358e+06	4.93369e+06	4.39138e+06	3.9142e+06	1.65462	0.00341891	2.2757	1.18631	up
6	Cmxn004016	C21H24O11	Dihydromarein	Flavonoids	Chalcones	-	3	17467.3	12016.5	24943	9	9	9	1.74562	0.040141	0.000496079	-10.9771	down
7	Zmdn008530	C30H22O8	Emodin bianthrone	Quinones	Anthraquinone	-	1	922.932	16763.2	69335	9	9	9	1.64325	0.29584	0.00031027	-11.6542	down
8	pmb0037	C10H15NO	Hordenine	Alkaloids	Phenolamine	539-15-1	3	9	9	9	105247	74559.9	113853	1.74835	0.0145214	10876.3	13.4089	up
9	mws0898	C10H12O2	Isoeugenol	Phenolic acids	Phenolic acids	97-54-1	3	42623.8	36638.4	38618.9	18971.2	10947.5	11155.7	1.65093	0.00225318	0.348439	-1.52102	down
10	Hmdn006566	C30H48O3	3,4-Open loop-lupine-4(23),20(29)-diene-24-hydroxy-3-carboxylic acid	Terpenoids	Triterpene	-	2	4571.48	7635.21	9	9	9	9	1.24088	0.208136	0.00221027	-8.82156	down
11	mws0823	C5H8O3	3-Methyl-2-Oxobutanoic acid	Organic acids	Organic acids	759-05-7	3	9	9	9	54919	53508.3	44026.6	1.74862	0.00450018	5646.44	12.4631	up
12	Ymjm000151	C16H18O9	5-O-Caffeoylquinic acid*	Phenolic acids	Phenolic acids	-	1	36955.1	31325.1	34107.1	9	9	9	1.74864	0.00226131	0.000263705	-11.8888	down
13	Qmhp090808	C29H28N2O4	18-Demethylparaensidimerin C	Alkaloids	Alkaloids	-	3	50713.4	41646.9	30841.6	9	9	9	1.74797	0.0190139	0.000219152	-12.1558	down
14	Lmsn011830	C30H46O5	2α,19α-Dihydroxy-3-oxours-12-en-28-oic acid	Terpenoids	Triterpene	176983-21-4	2	164999	164881	218776	378015	458688	317856	1.63412	0.0242572	2.10434	1.07337	up
15	pmn001423	C19H30O8	Roseoside	Others	Ketone compounds	54835-70-0	3	217812	128097	173087	67773.8	61696	73228.8	1.64836	0.0532286	0.390559	-1.35639	down
16	Lmyn012274	C30H46O4	Semimoronic acid	Terpenoids	Triterpene	102053-38-3	1	9	9	9	100645	115950	72462	1.74794	0.0170304	10705.8	13.3861	up
17	Ymjm000150	C16H18O9	4-O-Caffeoylquinic acid*	Phenolic acids	Phenolic acids	-	1	36956.2	30017.6	35459.4	9	9	9	1.7485	0.0037925	0.000263586	-11.8894	down
18	mws0221	C6H12N2O4S2	L-Cystine	Amino acids and derivatives	Amino acids and derivatives	56-89-3	3	15259.8	72733	39770	58296.1	118452	99617.5	1.17283	0.111949	2.16311	1.11311	up
19	MWS4295	C18H36O3	DL-2-hydroxystearic acid	Lipids	Free fatty acids	629-22-1	2	28676.3	36675.2	47690.5	67480.4	136158	121904	1.55605	0.0688274	2.87983	1.52598	up
20	Zmyn005252	C17H34O3	3-Hydroxy-palmitic acid methyl ester	Lipids	Free fatty acids	51883-36-4	3	25645.8	26910.4	27536.7	43201.9	82675.1	83070.9	1.57385	0.0828838	2.60882	1.3834	up
21	mws0055	C20H20O7	Tangeretin (4',5,6,7,8-Pentamethoxyflavone)	Flavonoids	Flavones	481-53-8	3	14208.4	6880.51	10881.5	54155.9	59669.8	16989.8	1.43866	0.129917	4.09176	2.03272	up
22	Zmyn004714	C18H34O3	Ricinoleic acid	Lipids	Free fatty acids	141-22-0	2	40255.9	33824.3	30633	9	9	9	1.74855	0.00651255	0.000257847	-11.9212	down
23	pma0134	C4H8O4	D-Threose	Others	Saccharides	95-43-2	3	9	9	9	61392	15367.9	15281.2	1.73833	0.183861	3408.93	11.7351	up
24	Lmzn006284	C30H48O4	2α-Hydroxyursolic acid*	Terpenoids	Triterpene	-	2	9	9	9	765786	167988	277894	1.74362	0.158979	44876.6	15.4537	up
25	Zmln000899	C15H20O9	Syringaldehyde-4-O-glucoside*	Phenolic acids	Phenolic acids	-	3	46927.6	49111.5	97954.9	38600	25054.8	21871	1.3961	0.153202	0.440869	-1.18158	down
26	Hmsn002948	C18H26O11	2-Hydroxyphenol-1-O-glucosyl(6→1)rhamnoside	Phenolic acids	Phenolic acids	-	3	4560.61	6294.9	1994.99	15060	15836.9	10394.7	1.50593	0.0131925	3.21323	1.68403	up
27	Cmmn005231	C20H24O8	Massoniresinol; Vladinol A	Lignans and Coumarins	Lignans	96087-10-4	2	9	9	9	50633.8	41405.5	9	1.23797	0.187578	3409.2	11.7352	up
28	Zmyn005384	C18H36O3	2R-Hydroxyoctadecanoic Acid	Lipids	Free fatty acids	26633-48-7	2	38425.3	31992.4	43475.9	60618.3	132295	114342	1.53471	0.0925308	2.69774	1.43175	up
29	pmp000241	C27H28O17	Luteolin-6-C-(2''-glucuronyl)glucoside	Flavonoids	Flavones	-	3	28113.6	155084	163779	13552.7	13593.9	9424.3	1.50552	0.142094	0.105399	-3.24607	down
30	Lmhp009190	C33H58O14	2-Linoleoylglycerol-1,3-di-O-glucoside	Lipids	Glycerol ester	-	2	12493.4	9527.15	4887.97	23439.9	15169	20568.5	1.41304	0.0309693	2.19921	1.13699	up
31	Wmmp000110	C14H18O9	mudanoside A	Phenolic acids	Phenolic acids	-	2	9	9	9	4896.22	15942.4	8239.73	1.73893	0.0976399	1076.97	10.0728	up
32	mws2628	C5H11NO2	N-Methyl-4-aminobutyric acid	Organic acids	Organic acids	1119-48-8	2	15953.3	10448.8	12960.7	4857.27	9	4166.66	1.04391	0.010066	0.229479	-2.12357	down
33	MWSHY0201	C27H30O14	Kaempferol-3,7-O-dirhamnoside (Kaempferitrin)	Flavonoids	Flavonols	482-38-2	3	6744.85	9618.27	7685.01	12544.3	10591.4	25986.2	1.29138	0.223762	2.04265	1.03044	up
34	MWSHY0018	C21H22O8	Nobiletin (5,6,7,8,3',4'-Hexamethoxyflavone)	Flavonoids	Flavones	478-01-3	2	10550.5	4849.71	12104.8	29102.3	55290.8	14079.2	1.35802	0.18497	3.58016	1.84002	up
35	Lmbn001930	C7H6O2	2-Hydroxybenzaldehyde (Salicylaldehyde)	Phenolic acids	Phenolic acids	90-02-8	3	41638.2	43746.9	44506.6	27053	6672.68	19901.6	1.34564	0.048383	0.412861	-1.27627	down
36	HJN003	C17H22O10	1-O-Sinapoyl-β-D-glucose	Phenolic acids	Phenolic acids	-	1	134717	109580	114578	46845.8	53532.5	57288.3	1.71292	0.00634852	0.439336	-1.1866	down
37	MWSmce674	C31H46O2	Phylloquinone (Vitamin K1)	Others	Vitamin	84-80-0	3	9	9	9	7762.15	15420.3	6039.26	1.74243	0.0776808	1082.28	10.0799	up
38	mws0369	C20H32O2	Arachidonic Acid	Lipids	Free fatty acids	506-32-1	3	11008.8	13070.6	9	9	9	9	1.24212	0.186485	0.00112087	-9.80116	down
39	Lmhp009769	C22H44NO7P	LysoPE 17:1	Lipids	LPE	-	1	20567.1	22916.1	21647.6	55665	35844.6	62226.4	1.62035	0.064109	2.36042	1.23904	up
40	Lmhp206353	C23H24O12	Tricin-4'-O-glucoside	Flavonoids	Flavones	-	3	9	9	9	16228.6	10864.2	30511.2	1.74356	0.0820095	2133.48	11.059	up
41	Lmhp010334	C27H48O9	2-Linoleoylglycerol-1-O-glucoside	Lipids	Glycerol ester	-	2	9	9	9	3992.98	5182.32	3296.87	1.74694	0.0171552	461.932	8.85154	up
42	Hmcp002187	C23H24O13	Limocitrin-3-O-galactoside*	Flavonoids	Flavonols	-	3	90326	27824.8	19664.7	88895.3	78689.7	195848	1.24677	0.175728	2.6371	1.39895	up
43	mws2220	C22H18O11	Gallocatechin 3-O-gallate	Flavonoids	Flavanols	5127-64-0	3	9	9	9	11163.3	9224.92	11849.4	1.74857	0.00531429	1193.99	10.2216	up
44	Lmmp010562	C24H38O4	Diisooctyl Phthalate*	Phenolic acids	Phenolic acids	27554-26-3	2	4.78409e+06	4.2573e+06	2.87931e+06	1.94588e+07	7.11191e+06	7.17178e+06	1.3839	0.216711	2.83058	1.5011	up
45	Lhdp112405	C24H38O4	Bis(2-ethylhexyl)phthalate*	Phenolic acids	Phenolic acids	117-81-7	2	2.08058e+06	1.87176e+06	1.33475e+06	8.22181e+06	3.21213e+06	3.09247e+06	1.40052	0.20834	2.74752	1.45813	up
46	Lmhp003658	C27H28O14	Monohydroxy-trimethoxyflavone-O-(6''-malonyl)glucoside	Flavonoids	Flavones	-	3	10343.2	36729.5	23390.7	9	9	9	1.74094	0.091101	0.000383178	-11.3497	down
47	pmn001505	C41H64O13	Oleanolic acid-3-O-xylosyl(1→3)glucuronide	Terpenoids	Triterpene Saponin	-	3	9	9	9	34260	18627.9	23000.6	1.7476	0.0322738	2810.68	11.4567	up
48	Lmhp003162	C34H42O21	Chrysoeriol-6,8-di-C-glucoside-4'-O-glucoside	Flavonoids	Flavones	-	1	492658	1.73745e+06	1.65622e+06	104887	176237	135718	1.61618	0.102218	0.107259	-3.22083	down
49	pmb0854	C26H48NO7P	LysoPC 18:3	Lipids	LPC	-	1	313377	463640	429370	9	9	9	1.74835	0.0125434	2.23809e-05	-15.4474	down
50	pme1598	C22H24O11	Hesperetin-5-O-glucoside	Flavonoids	Flavanones	69651-80-5	1	16559.5	14444.6	15942	48687.7	14325.7	33741.7	1.12783	0.236701	2.06098	1.04333	up
51	pme1816	C16H18O9	Neochlorogenic acid (5-O-Caffeoylquinic acid)*	Phenolic acids	Phenolic acids	906-33-2	1	24640.4	34602.4	31846.7	9	9	9	1.74824	0.00943778	0.000296412	-11.7201	down
52	Zmzn000078	C3H7O6P	Dihydroxyacetone phosphate	Others	Saccharides	57-04-5	1	9	9	9	5315.31	2217.59	6263.6	1.74017	0.0641098	510.982	8.99713	up
53	mws1077	C16H18O9	Scopoletin-7-O-glucoside (Scopolin)	Lignans and Coumarins	Coumarins	531-44-2	3	9	9	9	609608	9	245488	1.24254	0.248778	31670.6	14.9509	up
54	Lmmn001294	C14H20O9	Koaburaside	Phenolic acids	Phenolic acids	41653-73-0	2	9	9	9	13055.5	8898.82	38594.9	1.73711	0.161862	2242.56	11.1309	up
55	mws1350	C9H10O4	Syringaldehyde; 4-Hydroxy-3,5-Dimethoxybenzaldehyde	Phenolic acids	Phenolic acids	134-96-3	3	9	9	9	5854.37	9	20694.4	1.23564	0.287405	983.619	9.94196	up
56	Lhjp111617	C18H26O10	Methylgeniposide	Terpenoids	Monoterpenoids	-	1	32221.2	27655.8	38371	17727	13877.5	10342	1.60768	0.0103379	0.426944	-1.22788	down
57	Lmtn003598	C18H24O8	3-Prenyl-4-O-glucosyloxy-4-hydroxybenzoic acid	Phenolic acids	Phenolic acids	-	3	22316.1	19774.8	17097.9	6781.57	7482.72	12820.9	1.55416	0.0130976	0.457607	-1.12782	down
58	MWSmce706	C5H8N2O2	Cyclo(Ala-Gly)	Amino acids and derivatives	Amino acids and derivatives	4526-77-6	3	9	9	9	92498.7	67561.9	169908	1.746	0.0703108	12221.1	13.5771	up
59	Jmwn006041	C26H32O11	(7S,8R)-dehydrodiconiferylalcohol-9'-O-β-D-glucopyranoside	Phenolic acids	Phenolic acids	-	3	9	9	9	13163.2	17560.8	19701.2	1.74757	0.0128705	1867.6	10.867	up
60	mws1313	C20H20O7	Sinensetin (5,6,7,3',4'-pentamethoxyflavone)	Flavonoids	Flavones	2306-27-6	3	661.348	784.064	1726.61	4956.8	4144.91	797.286	1.04743	0.215207	3.12072	1.64188	up
61	pmf0426	C41H32O26	1,2,3,4,6-Penta-O-galloyl-β-D-glucose	Phenolic acids	Phenolic acids	14937-32-7	3	7583.61	5189.96	5272.02	3732.98	3043.56	2225.96	1.52672	0.0411564	0.498875	-1.00325	down
62	Zmpn000095	C6H15O9P	Sorbitol-6-phosphate	Others	Saccharides	20479-58-7	3	5568.85	3234.29	2305.38	11976.2	6466.27	7371.21	1.41604	0.0833356	2.32377	1.21647	up
63	pmb0130	C12H14N2O	Acetryptine	Alkaloids	Plumerane	3551-18-6	3	14859.8	34058.5	38558.3	14061.1	10922.9	8033.4	1.40263	0.122863	0.377442	-1.40567	down
64	MWS0559	C6H10O5	1,6-anhydro-β-D-glucose	Others	Saccharides	498-07-7	3	9	9	9	11576.8	66351.3	12276.6	1.72853	0.239401	3340.92	11.706	up
65	Hmmp004965	C22H22O11	Diosmetin-7-O-glucoside*	Flavonoids	Flavones	20126-59-4	3	51371.2	46918.1	54116.8	9	9	9	1.74863	0.00170092	0.000177158	-12.4627	down
66	Cmsp002787	C11H14O5	3,4'-Dihydroxy-3',5'-dimethoxypropiophenone	Phenolic acids	Phenolic acids	136196-47-9	3	9	9	9	12551.3	9	36637.9	1.23872	0.266752	1822.16	10.8314	up
67	pmp001309	C21H20O12	6-Hydroxykaempferol-7-O-glucoside*	Flavonoids	Flavonols	-	1	9	9	9	9	115015	142547	1.22797	0.188129	9539.64	13.2197	up
68	Lmhn003240	C11H10O6	Benzoylmalic acid	Phenolic acids	Phenolic acids	22138-51-8	3	173873	372925	195291	78540.6	182121	67549.5	1.30185	0.148825	0.44228	-1.17697	down
69	mws1589	C18H32O16	D-Panose	Others	Saccharides	33401-87-5	1	9	9	11762.4	11891.6	5816.58	11695.2	1.20876	0.274571	2.49595	1.31959	up
70	Cmyp002064	C22H22O11	Yuanhuanin*	Flavonoids	Flavones	83133-14-6	3	17854.3	40730.5	35048.5	9	9	9	1.74535	0.0453002	0.000288359	-11.7598	down

## Sheet: Table S2 
Table S2. Differentially accumulated metabolites (DAMs) in NS4d_vs_NR4d.
#	Index	Compounds	Classes	VIP	P-value	Fold_Change	Log2FC
1	pmb0037	Hordenine	Alkaloids	1.74835	0.0145214	10876.3	13.4089
2	mws0221	L-Cystine	Amino acids and derivatives	1.17283	0.111949	2.16311	1.11311
3	MWSmce706	Cyclo(Ala-Gly)	Amino acids and derivatives	1.746	0.0703108	12221.1	13.5771
4	mws0055	Tangeretin (4',5,6,7,8-Pentamethoxyflavone)	Flavonoids	1.43866	0.129917	4.09176	2.03272
5	MWSHY0018	Nobiletin (5,6,7,8,3',4'-Hexamethoxyflavone)	Flavonoids	1.35802	0.18497	3.58016	1.84002
6	Lmhp206353	Tricin-4'-O-glucoside	Flavonoids	1.74356	0.0820095	2133.48	11.059
7	Hmcp002187	Limocitrin-3-O-galactoside*	Flavonoids	1.24677	0.175728	2.6371	1.39895
8	mws2220	Gallocatechin 3-O-gallate	Flavonoids	1.74857	0.00531429	1193.99	10.2216
9	mws1313	Sinensetin (5,6,7,3',4'-pentamethoxyflavone)	Flavonoids	1.04743	0.215207	3.12072	1.64188
10	pmp001309	6-Hydroxykaempferol-7-O-glucoside*	Flavonoids	1.22797	0.188129	9539.64	13.2197
11	Cmmn005231	Massoniresinol; Vladinol A	Lignans and Coumarins	1.23797	0.187578	3409.2	11.7352
12	mws1077	Scopoletin-7-O-glucoside (Scopolin)	Lignans and Coumarins	1.24254	0.248778	31670.6	14.9509
13	Lmhp010334	2-Linoleoylglycerol-1-O-glucoside	Lipids	1.74694	0.0171552	461.932	8.85154
14	pma0134	D-Threose	Others	1.73833	0.183861	3408.93	11.7351
15	MWSmce674	Phylloquinone (Vitamin K1)	Others	1.74243	0.0776808	1082.28	10.0799
16	Zmzn000078	Dihydroxyacetone phosphate	Others	1.74017	0.0641098	510.982	8.99713
17	Zmpn000095	Sorbitol-6-phosphate	Others	1.41604	0.0833356	2.32377	1.21647
18	MWS0559	1,6-anhydro-β-D-glucose	Others	1.72853	0.239401	3340.92	11.706
19	mws1589	D-Panose	Others	1.20876	0.274571	2.49595	1.31959
20	Hmsn002948	2-Hydroxyphenol-1-O-glucosyl(6→1)rhamnoside	Phenolic acids	1.50593	0.0131925	3.21323	1.68403
21	Wmmp000110	mudanoside A	Phenolic acids	1.73893	0.0976399	1076.97	10.0728
22	Lmmp010562	Diisooctyl Phthalate*	Phenolic acids	1.3839	0.216711	2.83058	1.5011
23	Lhdp112405	Bis(2-ethylhexyl) phthalate*	Phenolic acids	1.40052	0.20834	2.74752	1.45813
24	Lmmn001294	Koaburaside	Phenolic acids	1.73711	0.161862	2242.56	11.1309
25	mws1350	Syringaldehyde; 4-Hydroxy-3,5-Dimethoxybenzaldehyde	Phenolic acids	1.23564	0.287405	983.619	9.94196
26	Jmwn006041	(7S,8R)-dehydrodiconiferylalcohol-9'-O-β-D-glucopyranoside	Phenolic acids	1.74757	0.0128705	1867.6	10.867
27	Cmsp002787	3,4'-Dihydroxy-3',5'-dimethoxypropiophenone	Phenolic acids	1.23872	0.266752	1822.16	10.8314
28	Lmyn012274	Semimoronic acid	Terpenoids	1.74794	0.0170304	10705.8	13.3861
29	Lmzn006284	2α-Hydroxyursolic acid*	Terpenoids	1.74362	0.158979	44876.6	15.4537
30	pmn001505	Oleanolic acid-3-O-xylosyl(1→3)glucuronide	Terpenoids	1.7476	0.0322738	2810.68	11.4567

## Sheet: Table S3
Table S3. KEGG pathways enrichment of metabolites.
KEGG_pathway	ko_ID	Cluter_frequency	Metabolome_frequency	P-value	Corrected_P-value
Phenylpropanoid biosynthesis	ko00940	3	16	0.0185688	0.519926
Flavonoid biosynthesis	ko00941	2	4	0.0980412	1
Flavonoid biosynthesis	ko00941	2	4	0.0980412	1
Biosynthesis of cofactors	ko01240	1	50	0.882939	1
Carbon metabolism	ko01200	1	20	0.556299	1
Tyrosine metabolism	ko00350	1	9	0.30154	1
Pantothenate and CoA biosynthesis	ko00770	1	10	0.329294	1

## Sheet: Table S4
Table S4. RNA-Seq stastics for 12 samples.
Sample	Raw Reads	Clean Reads	Clean Bases (Gb)	Error Rate (%)	Q20(%)	Q30(%)	GC Content(%)	Reads mapped	Unique mapped to 9930v2	% Mapped reads
NR0d-1	48328188	46613288	6.99	0.03	96.36	90.37	43.13	44473220	43569452	0.9347
NR0d-2	47484532	45505092	6.83	0.03	97.12	92.02	43.28	43611884	42685034	0.938
NR0d-3	46634400	44804774	6.72	0.03	97.14	91.98	43.11	43226617	42348009	0.9452
NS0d-1	46442264	43819490	6.57	0.03	97.14	92.07	43.3	47879254	46881720	0.9386
NS0d-2	48907632	47411310	7.11	0.03	96.33	90.27	43.4	44550634	43631815	0.9372
NS0d-3	48644322	46657016	7	0.03	96.94	91.62	43.35	39617719	38762451	0.9382
NR4d-1	52271684	49950634	7.49	0.03	97.01	91.81	42.75	42102803	41163945	0.9394
NR4d-2	48995444	46554318	6.98	0.03	96.33	90.26	42.95	45212071	44265778	0.9337
NR4d-3	46979134	41315428	6.2	0.03	96.42	90.48	43.18	44800229	43818542	0.9392
NS4d-1	44865832	40732506	6.11	0.03	96	89.68	43.55	38590977	37773764	0.9274
NS4d-2	47450504	45107132	6.77	0.03	96.32	90.24	43.4	43021503	42098124	0.9333
NS4d-3	47855638	45540616	6.83	0.03	97.01	91.86	43.44	43504222	42535584	0.934

## Sheet: Table S5
Table S5. Primers used for qRT-PCR.
Gene	Predicted functions	Sense Primer	Anti-sense Primer
Csa6G401340	Carboxylesterase 15; contains IPR013094 (Alpha/beta hydrolase fold-3)	CGTTCGTGACTTGGTGAT	AATCCGCTTCGCTAATACA
Csa2G403160	BZIP transcription factor; contains IPR004827 (Basic-leucine zipper domain), IPR025422 (DOG1 domain)	TTGAACAGGCAGACCATC	CCAGAGCGAACTAAGAACA
Csa6G084580	Disease resistance response protein; contains IPR004265 (Plant disease resistance response protein)	TCCTCTTCCTCTTCCTTATTC	ATGGCTTAGTTGCTCTGTT
Csa4G638510	MYB transcription factor; contains IPR009057 (Homeodomain-like)	CGGTCGGACAGATAATGC	CGTCGGAAGTGTGATTACT
Csa1G586860	MYB transcription factor; contains IPR009057 (Homeodomain-like)	TGGACAGAAGAAGAGCATAG	CGTTGGAGTTCTAGTGGTT
Csa1G043010	Hydrolase, alpha/beta fold family protein; contains IPR022742 (Alpha/beta hydrolase, N-terminal)	ATCCTCGTCGTCGCTAAT	CGAAGGCATTGACCAACA
Csa4G620550	UDP-glycosyltransferase 1; contains IPR002213 (UDP-glucuronosyl/UDP-glucosyltransferase)	TTACTACCTCCACCAACCA	AGATAGGCAGCACAAGAAG
Csa1G071840	MYB transcription factor; contains IPR009057 (Homeodomain-like)	CGGTAACGGTAACGGTAAT	CTCTCATCTTCAGTTGGACTA
Csactin	Reference, actin	TATGTTGCTCTTGACTACGA	CCGATGGTGATGACTTGT

## Sheet: Table S6
Table S6. List of DEGs in NS4d_vs_NR4d comparison.
#	ID	Annotation	log2FoldChange	pvalue	Padj	regulated	chr	start	end	KEGG	GO
1	Csa1G001440	Unknown protein	1.72315	0.000685481	0.0105933	up	1	232886	233488	--	--
2	Csa1G002950	Unknown protein	1.62715	0.000417462	0.00733489	up	1	565892	566441	--	GO:0016021,integral component of membrane; GO:0005575,cellular_component; GO:0016020,membrane; GO:0031224,intrinsic component of membrane; GO:0110165,cellular anatomical entity
3	Csa1G013190	Cytochrome P450 flavonoid 3',5'-hydroxylase; contains IPR001128 (Cytochrome P450)	1.1921	4.71471e-05	0.00140373	up	1	1761485	1764534	K05280 flavonoid 3'-monooxygenase [EC:1.14.14.82] | (RefSeq) flavonoid 3'-monooxygenase (A)	GO:0005789,endoplasmic reticulum membrane; GO:0016021,integral component of membrane; GO:0016711,flavonoid 3'-monooxygenase activity; GO:0020037,heme binding; GO:0005506,iron ion binding; GO:0009813,flavonoid biosynthetic process; GO:0003674,molecular_function; GO:0003824,catalytic activity; GO:0004497,monooxygenase activity; GO:0016491,oxidoreductase activity; GO:0016705,oxidoreductase activity,…
4	Csa1G032440	At5g37260-like protein; contains IPR009057 (Homeodomain-like)	1.40071	2.85796e-16	1.82505e-13	up	1	3442756	3446260	K12133 MYB-related transcription factor LHY | (RefSeq) LHY protein (A)	GO:0005634,nucleus; GO:0003677,DNA binding; GO:0003700,DNA-binding transcription factor activity; GO:0007623,circadian rhythm; GO:0006355,regulation of transcription, DNA-templated; GO:0003674,molecular_function; GO:0003676,nucleic acid binding; GO:0005488,binding; GO:0097159,organic cyclic compound binding; GO:1901363,heterocyclic compound binding; GO:0140110,transcription regulator activity; GO…
5	Csa1G032450	BTB/POZ domain-containing protein; contains IPR000197 (Zinc finger, TAZ-type), IPR011333 (BTB/POZ fold)	1.21902	0.000647517	0.0101364	up	1	3451337	3453508	K10523 speckle-type POZ protein | (RefSeq) BTB/POZ domain-containing protein At1g01640-like (A)	GO:0005737,cytoplasm; GO:0005634,nucleus; GO:0005516,calmodulin binding; GO:0046872,metal ion binding; GO:0009553,embryo sac development; GO:0009555,pollen development; GO:0016567,protein ubiquitination; GO:0006355,regulation of transcription, DNA-templated; GO:0009733,response to auxin; GO:0042542,response to hydrogen peroxide; GO:0009751,response to salicylic acid; GO:0003674,molecular_function…
6	Csa1G043010	Hydrolase, alpha/beta fold family protein; contains IPR022742 (Alpha/beta hydrolase, N-terminal)	1.29515	6.81753e-06	0.000298473	up	1	4650282	4654179	K01054 acylglycerol lipase [EC:3.1.1.23] | (RefSeq) uncharacterized protein LOC101210503 isoform X1 (A)	GO:0005783,endoplasmic reticulum; GO:0005794,Golgi apparatus; GO:0016020,membrane; GO:0005634,nucleus; GO:0005886,plasma membrane; GO:0009506,plasmodesma; GO:0003846,2-acylglycerol O-acyltransferase activity; GO:0090430,caffeoyl-CoA: alcohol caffeoyl transferase activity; GO:0016787,hydrolase activity; GO:0016298,lipase activity; GO:0004622,lysophospholipase activity; GO:0009809,lignin biosynthet…
7	Csa1G050270	Emb|CAB62340.1	1.18349	6.33851e-09	7.87805e-07	up	1	5827494	5828657	--	--
8	Csa1G064730	1-aminocyclopropane-1-carboxylate oxidase 4; contains IPR005123 (Oxoglutarate/iron-dependent dioxygenase), IPR026992 (Non-haem dioxygenase N-terminal domain), IPR027443 (Isopenicillin N synthase-like)	1.11214	3.4265e-05	0.00109784	up	1	6826512	6828846	K04125 gibberellin 2beta-dioxygenase [EC:1.14.11.13] | (RefSeq) gibberellin 2-beta-dioxygenase 8-like (A)	GO:0052635,C-20 gibberellin 2-beta-dioxygenase activity; GO:0051213,dioxygenase activity; GO:0046872,metal ion binding; GO:0009686,gibberellin biosynthetic process; GO:0009685,gibberellin metabolic process; GO:0003674,molecular_function; GO:0003824,catalytic activity; GO:0016491,oxidoreductase activity; GO:0016705,oxidoreductase activity, acting on paired donors, with incorporation or reduction o…
9	Csa1G066520	BTB/POZ domain-containing protein; contains IPR011333 (BTB/POZ fold), IPR027356 (NPH3 domain)	1.22302	1.91812e-07	1.50515e-05	up	1	6966791	6968576	--	GO:0016567,protein ubiquitination; GO:0006464,cellular protein modification process; GO:0006807,nitrogen compound metabolic process; GO:0008150,biological_process; GO:0008152,metabolic process; GO:0009987,cellular process; GO:0019538,protein metabolic process; GO:0032446,protein modification by small protein conjugation; GO:0036211,protein modification process; GO:0043170,macromolecule metabolic …
10	Csa1G070620	Serine/threonine-protein kinase; contains IPR000742 (Epidermal growth factor-like domain), IPR000858 (S-locus glycoprotein), IPR001480 (Bulb-type lectin domain), IPR003609 (Apple-like), IPR011009 (Protein kinase-like domain), IPR013320 (Concanavalin A-like lectin/glucanase, subgroup), IPR021820 (S-locus receptor kinase, C-terminal)	1.54172	2.62516e-12	6.75213e-10	up	1	7086535	7089991	K03327 multidrug resistance protein, MATE family | (RefSeq) hypothetical protein (A)	GO:0016021,integral component of membrane; GO:0005886,plasma membrane; GO:0005524,ATP binding; GO:0005516,calmodulin binding; GO:0030246,carbohydrate binding; GO:0106310,protein serine kinase activity; GO:0004674,protein serine/threonine kinase activity; GO:0106311,protein threonine kinase activity; GO:0006468,protein phosphorylation; GO:0048544,recognition of pollen; GO:0000166,nucleotide bindin…
11	Csa1G071840	MYB transcription factor; contains IPR009057 (Homeodomain-like)	2.1649	0.000555007	0.00906364	up	1	7223088	7224298	K09422 transcription factor MYB, plant | (RefSeq) transcription factor MYB102 (A)	GO:0005634,nucleus; GO:0003677,DNA binding; GO:0003700,DNA-binding transcription factor activity; GO:0006952,defense response; GO:0006355,regulation of transcription, DNA-templated; GO:0006970,response to osmotic stress; GO:0009611,response to wounding; GO:0003674,molecular_function; GO:0003676,nucleic acid binding; GO:0005488,binding; GO:0097159,organic cyclic compound binding; GO:1901363,hetero…
12	Csa1G288020	WAT1-related protein; contains IPR000620 (Drug/metabolite transporter)	1.05082	7.64635e-08	6.90745e-06	up	1	13283608	13286123	K17500 integrin-linked kinase-associated serine/threonine phosphatase 2C [EC:3.1.3.16] | (RefSeq) WAT1-related protein At3g18200-like (A)	GO:0016021,integral component of membrane; GO:0005886,plasma membrane; GO:0022857,transmembrane transporter activity; GO:0003674,molecular_function; GO:0005215,transporter activity; GO:0005575,cellular_component; GO:0016020,membrane; GO:0031224,intrinsic component of membrane; GO:0110165,cellular anatomical entity; GO:0071944,cell periphery
13	Csa1G420340	1-deoxy-D-xylulose-5-phosphate synthase; contains IPR005477 (Deoxyxylulose-5-phosphate synthase), IPR009014 (Transketolase, C-terminal/Pyruvate-ferredoxin oxidoreductase, domain II)	1.07425	2.84801e-08	3.04869e-06	up	1	15219407	15223751	K01662 1-deoxy-D-xylulose-5-phosphate synthase [EC:2.2.1.7] | (RefSeq) probable 1-deoxy-D-xylulose-5-phosphate synthase 2, chloroplastic (A)	GO:0009507,chloroplast; GO:0008661,1-deoxy-D-xylulose-5-phosphate synthase activity; GO:0046872,metal ion binding; GO:0016744,transferase activity, transferring aldehyde or ketonic groups; GO:0052865,1-deoxy-D-xylulose 5-phosphate biosynthetic process; GO:0016114,terpenoid biosynthetic process; GO:0009228,thiamine biosynthetic process; GO:0003674,molecular_function; GO:0003824,catalytic activity;…
14	Csa1G433070	receptor protein kinase; contains IPR011009 (Protein kinase-like domain), IPR013320 (Concanavalin A-like lectin/glucanase, subgroup)	1.45269	0.000222297	0.00455894	up	1	15853308	15854765	K20606 mitogen-activated protein kinase kinase kinase ANP1 [EC:2.7.11.25] | (RefSeq) receptor-like serine/threonine-protein kinase SD1-7 isoform X1 (A)	GO:0016021,integral component of membrane; GO:0005886,plasma membrane; GO:0005524,ATP binding; GO:0005516,calmodulin binding; GO:0030246,carbohydrate binding; GO:0106310,protein serine kinase activity; GO:0004674,protein serine/threonine kinase activity; GO:0106311,protein threonine kinase activity; GO:0045087,innate immune response; GO:0006468,protein phosphorylation; GO:0048544,recognition of p…
15	Csa1G501830	Unknown protein	1.33314	0.00034956	0.00643173	up	1	17714859	17715764	--	--
16	Csa1G533490	serine/threonine protein phosphatase superfamily protein; contains IPR004843 (Metallophosphoesterase domain)	1.52053	4.54615e-08	4.29725e-06	up	1	18960326	18965527	--	GO:0009507,chloroplast; GO:0030145,manganese ion binding; GO:0016791,phosphatase activity; GO:0004721,phosphoprotein phosphatase activity; GO:0003674,molecular_function; GO:0005488,binding; GO:0043167,ion binding; GO:0043169,cation binding; GO:0046872,metal ion binding; GO:0046914,transition metal ion binding; GO:0003824,catalytic activity; GO:0016787,hydrolase activity; GO:0016788,hydrolase acti…
17	Csa1G536320	Unknown protein	1.70994	0.000217754	0.00450191	up	1	19268668	19270900	--	--
18	Csa1G569170	Unknown protein	2.79736	1.0755e-09	1.56828e-07	up	1	20835665	20839318	--	--
19	Csa1G586860	MYB transcription factor; contains IPR009057 (Homeodomain-like)	1.06963	0.000645727	0.0101285	up	1	22026016	22027545	K08869 aarF domain-containing kinase | (RefSeq) predicted protein (A)	GO:0005634,nucleus; GO:0003700,DNA-binding transcription factor activity; GO:0000976,transcription regulatory region sequence-specific DNA binding; GO:0008270,zinc ion binding; GO:0010252,auxin homeostasis; GO:0048527,lateral root development; GO:0048366,leaf development; GO:0010150,leaf senescence; GO:2000469,negative regulation of peroxidase activity; GO:0000122,negative regulation of transcrip…
20	Csa2G000720	Acid phosphatase 1, putative; contains IPR005519 (Acid phosphatase (Class B)), IPR023214 (HAD-like domain)	2.54453	5.13218e-09	6.64635e-07	up	2	417322	418713	K20728 vegetative storage protein 2 | (RefSeq) vegetative storage protein 2-like (A)	GO:0003993,acid phosphatase activity; GO:0003674,molecular_function; GO:0003824,catalytic activity; GO:0016787,hydrolase activity; GO:0016788,hydrolase activity, acting on ester bonds; GO:0016791,phosphatase activity; GO:0042578,phosphoric ester hydrolase activity
21	Csa2G059780	Ycf2; contains IPR027417 (P-loop containing nucleoside triphosphate hydrolase)	1.11866	0.00371154	0.0365412	up	2	4528172	4529518	--	GO:0009570,chloroplast stroma; GO:0005524,ATP binding; GO:0016887,ATPase activity; GO:0000166,nucleotide binding; GO:0003674,molecular_function; GO:0005488,binding; GO:0017076,purine nucleotide binding; GO:0030554,adenyl nucleotide binding; GO:0032553,ribonucleotide binding; GO:0032555,purine ribonucleotide binding; GO:0032559,adenyl ribonucleotide binding; GO:0035639,purine ribonucleoside tripho…
22	Csa2G080160	GDSL esterase/lipase; contains IPR001087 (Lipase, GDSL)	1.28026	4.74464e-07	3.3157e-05	up	2	6619145	6623770	K00679 phospholipid:diacylglycerol acyltransferase [EC:2.3.1.158] | (RefSeq) hypothetical protein (A)	GO:0005576,extracellular region; GO:0016788,hydrolase activity, acting on ester bonds; GO:0042335,cuticle development; GO:0016042,lipid catabolic process; GO:0003674,molecular_function; GO:0003824,catalytic activity; GO:0016787,hydrolase activity; GO:0007275,multicellular organism development; GO:0008150,biological_process; GO:0032501,multicellular organismal process; GO:0032502,developmental pro…
23	Csa2G354950	Receptor protein kinase-like protein; contains IPR001611 (Leucine-rich repeat), IPR003591 (Leucine-rich repeat, typical subtype), IPR011009 (Protein kinase-like domain), IPR013210 (Leucine-rich repeat-containing N-terminal, type 2), IPR013320 (Concanavalin A-like lectin/glucanase, subgroup)	1.18179	0.00252036	0.0274233	up	2	16638458	16641990	K13420 LRR receptor-like serine/threonine-protein kinase FLS2 [EC:2.7.11.1] | (RefSeq) probable LRR receptor-like serine/threonine-protein kinase At3g47570 (A)	GO:0016021,integral component of membrane; GO:0005886,plasma membrane; GO:0005524,ATP binding; GO:0106310,protein serine kinase activity; GO:0106311,protein threonine kinase activity; GO:0000166,nucleotide binding; GO:0003674,molecular_function; GO:0005488,binding; GO:0017076,purine nucleotide binding; GO:0030554,adenyl nucleotide binding; GO:0032553,ribonucleotide binding; GO:0032555,purine ribo…
24	Csa3G064230	Unknown protein	1.14936	4.4186e-06	0.000214209	up	3	3707985	3708398	--	--
25	Csa3G073790	Bifunctional inhibitor/lipid-transfer protein/seed storage 2S albumin-like protein; contains IPR016140 (Bifunctional inhibitor/plant lipid transfer protein/seed storage helical domain)	1.22952	0.00269342	0.0287821	up	3	3836721	3838987	--	--
26	Csa3G134700	Acid phosphatase 1, putative; contains IPR005519 (Acid phosphatase (Class B)), IPR023214 (HAD-like domain)	1.22096	0.000854768	0.0124445	up	3	8975473	8977251	K20728 vegetative storage protein 2 | (RefSeq) vegetative storage protein 2-like (A)	GO:0003993,acid phosphatase activity; GO:0003674,molecular_function; GO:0003824,catalytic activity; GO:0016787,hydrolase activity; GO:0016788,hydrolase activity, acting on ester bonds; GO:0016791,phosphatase activity; GO:0042578,phosphoric ester hydrolase activity
27	Csa3G142400	Proteinase inhibitor; contains IPR000864 (Proteinase inhibitor I13, potato inhibitor I)	1.01609	1.26399e-09	1.8006e-07	up	3	9362439	9363269	--	GO:0004867,serine-type endopeptidase inhibitor activity; GO:0009611,response to wounding; GO:0003674,molecular_function; GO:0004857,enzyme inhibitor activity; GO:0004866,endopeptidase inhibitor activity; GO:0030234,enzyme regulator activity; GO:0030414,peptidase inhibitor activity; GO:0061134,peptidase regulator activity; GO:0061135,endopeptidase regulator activity; GO:0098772,molecular function …
28	Csa3G146290	Heat stress transcription factor A-2; contains IPR011991 (Winged helix-turn-helix DNA-binding domain)	1.17698	0.000381692	0.00687602	up	3	9681574	9684171	K09419 heat shock transcription factor, other eukaryote | (RefSeq) heat stress transcription factor A-6b (A)	GO:0005737,cytoplasm; GO:0005634,nucleus; GO:0003700,DNA-binding transcription factor activity; GO:0000978,RNA polymerase II cis-regulatory region sequence-specific DNA binding; GO:0000976,transcription regulatory region sequence-specific DNA binding; GO:0034605,cellular response to heat; GO:0006357,regulation of transcription by RNA polymerase II; GO:0003674,molecular_function; GO:0140110,transc…
29	Csa3G665100	Unknown protein	1.34174	0.00533392	0.0471209	up	3	26032398	26032896	--	--
30	Csa3G813300	Ovarian cancer-associated gene 2 protein-like protein; contains IPR005645 (Serine hydrolase FSH)	1.45117	0.000649876	0.0101592	up	3	31328141	31330785	--	GO:0005737,cytoplasm; GO:0005634,nucleus; GO:0005575,cellular_component; GO:0005622,intracellular anatomical structure; GO:0110165,cellular anatomical entity; GO:0043226,organelle; GO:0043227,membrane-bounded organelle; GO:0043229,intracellular organelle; GO:0043231,intracellular membrane-bounded organelle
31	Csa3G821560	HAD-superfamily hydrolase; contains IPR005833 (Haloacid dehalogenase/epoxide hydrolase), IPR006402 (HAD-superfamily hydrolase, subfamily IA, variant 3), IPR006439 (HAD-superfamily hydrolase, subfamily IA, variant 1), IPR023214 (HAD-like domain)	1.28012	2.07382e-10	3.58927e-08	up	3	32024192	32027103	K01097 N-acylneuraminate-9-phosphatase [EC:3.1.3.29] | (RefSeq) N-acylneuraminate-9-phosphatase isoform X1 (A)	GO:0016787,hydrolase activity; GO:0003674,molecular_function; GO:0003824,catalytic activity
32	Csa3G852640	Cytochrome P450, putative; contains IPR001128 (Cytochrome P450)	1.573	8.14862e-09	9.55091e-07	up	3	35517555	35520265	K23136 fraxetin 5-hydroxylase [EC:1.14.14.164] | (RefSeq) cytochrome P450 CYP82D47-like (A)	GO:0016021,integral component of membrane; GO:0020037,heme binding; GO:0005506,iron ion binding; GO:0004497,monooxygenase activity; GO:0016705,oxidoreductase activity, acting on paired donors, with incorporation or reduction of molecular oxygen; GO:0019438,aromatic compound biosynthetic process; GO:0009699,phenylpropanoid biosynthetic process; GO:0003674,molecular_function; GO:0005488,binding; GO…
33	Csa3G865340	Thioredoxin; contains IPR005746 (Thioredoxin), IPR012336 (Thioredoxin-like fold)	1.38736	7.83931e-10	1.2098e-07	up	3	36118972	36120230	K03671 thioredoxin 1 | (RefSeq) thioredoxin H-type (A)	GO:0005737,cytoplasm; GO:0005575,cellular_component; GO:0005622,intracellular anatomical structure; GO:0110165,cellular anatomical entity
34	Csa4G050270	Cation/H(+) antiporter 18; contains IPR006153 (Cation/H+ exchanger)	1.46546	3.45273e-06	0.000174824	up	4	4078069	4081140	--	GO:0012505,endomembrane system; GO:0016021,integral component of membrane; GO:0005770,late endosome; GO:0015299,solute:proton antiporter activity; GO:0006813,potassium ion transport; GO:0006885,regulation of pH; GO:0003674,molecular_function; GO:0005215,transporter activity; GO:0008324,cation transmembrane transporter activity; GO:0015075,ion transmembrane transporter activity; GO:0015078,proton …
35	Csa4G075200	Gibberellin 2-oxidase; contains IPR002283 (Isopenicillin N synthase), IPR026992 (Non-haem dioxygenase N-terminal domain), IPR027443 (Isopenicillin N synthase-like)	1.25019	0.000602374	0.0096333	up	4	5347658	5349639	K04125 gibberellin 2beta-dioxygenase [EC:1.14.11.13] | (RefSeq) gibberellin 2-beta-dioxygenase 1 (A)	GO:0052634,C-19 gibberellin 2-beta-dioxygenase activity; GO:0046872,metal ion binding; GO:0009686,gibberellin biosynthetic process; GO:0003674,molecular_function; GO:0003824,catalytic activity; GO:0016491,oxidoreductase activity; GO:0016705,oxidoreductase activity, acting on paired donors, with incorporation or reduction of molecular oxygen; GO:0016706,2-oxoglutarate-dependent dioxygenase activit…
36	Csa4G296140	Catalytic/ hydrolase; contains IPR006402 (HAD-superfamily hydrolase, subfamily IA, variant 3), IPR023214 (HAD-like domain)	1.98372	1.61802e-21	2.99641e-18	up	4	11987273	11990583	K07025 putative hydrolase of the HAD superfamily | (RefSeq) uncharacterized protein C24B11.05 (A)	GO:0016787,hydrolase activity; GO:0003674,molecular_function; GO:0003824,catalytic activity
37	Csa4G296260	Avr9/Cf-9 rapidly elicited protein; contains IPR007700 (Protein of unknown function DUF668), IPR021864 (Protein of unknown function DUF3475)	1.06611	0.00303764	0.0315968	up	4	12061405	12062951	K18081 myotubularin-related protein 1/2 [EC:3.1.3.64 3.1.3.95] | (RefSeq) phosphatidylinositol-3-phosphatase myotubularin-2-like (A)	GO:0005634,nucleus; GO:0005886,plasma membrane; GO:0007275,multicellular organism development; GO:0045927,positive regulation of growth; GO:0006109,regulation of carbohydrate metabolic process; GO:0043434,response to peptide hormone; GO:0008150,biological_process; GO:0032501,multicellular organismal process; GO:0032502,developmental process; GO:0048856,anatomical structure development; GO:0040007…
38	Csa4G638510	MYB transcription factor; contains IPR009057 (Homeodomain-like)	1.05732	0.00241999	0.0266127	up	4	20977234	20978047	K09422 transcription factor MYB, plant | (RefSeq) transcription factor MYB44 (A)	GO:0005634,nucleus; GO:0003700,DNA-binding transcription factor activity; GO:0000981,DNA-binding transcription factor activity, RNA polymerase II-specific; GO:0000978,RNA polymerase II cis-regulatory region sequence-specific DNA binding; GO:0000976,transcription regulatory region sequence-specific DNA binding; GO:0048527,lateral root development; GO:0010929,positive regulation of auxin mediated s…
39	Csa4G643100	uncharacterized protein F9K23.1	1.7768	0.000538056	0.00886611	up	4	21627180	21627994	--	GO:0005737,cytoplasm; GO:0005634,nucleus; GO:0009691,cytokinin biosynthetic process; GO:0009690,cytokinin metabolic process; GO:0009736,cytokinin-activated signaling pathway; GO:0006725,cellular aromatic compound metabolic process; GO:0006807,nitrogen compound metabolic process; GO:0008150,biological_process; GO:0008152,metabolic process; GO:0009058,biosynthetic process; GO:0009308,amine metaboli…
40	Csa4G648590	uncharacterized protein OSJNBa0014K08.16; contains IPR012876 (Protein of unknown function DUF1677, plant)	1.04943	0.00123294	0.0161319	up	4	22267814	22268919	--	--
41	Csa5G168830	Seed specific protein Bn15D1B	1.2299	2.99525e-10	5.0889e-08	up	5	6649202	6650725	--	--
42	Csa5G292250	Similarity to DNA helicase; contains IPR027417 (P-loop containing nucleoside triphosphate hydrolase)	1.18904	0.00125195	0.0162872	up	5	12316841	12321221	K10706 senataxin [EC:3.6.4.-] | (RefSeq) uncharacterized LOC100855072 (A)	GO:0005634,nucleus; GO:0005524,ATP binding; GO:0004386,helicase activity; GO:0016787,hydrolase activity; GO:0003723,RNA binding; GO:0009553,embryo sac development; GO:0010183,pollen tube guidance; GO:0009875,pollen-pistil interaction; GO:0000166,nucleotide binding; GO:0003674,molecular_function; GO:0005488,binding; GO:0017076,purine nucleotide binding; GO:0030554,adenyl nucleotide binding; GO:003…
43	Csa5G612880	3-oxo-5-alpha-steroid 4-dehydrogenase; contains IPR001104 (3-oxo-5-alpha-steroid 4-dehydrogenase, C-terminal)	1.17365	0.000361061	0.00656826	up	5	24062020	24064554	K09591 steroid 5-alpha-reductase [EC:1.3.1.22] | (RefSeq) steroid 5-alpha-reductase DET2 (A)	GO:0016021,integral component of membrane; GO:0003865,3-oxo-5-alpha-steroid 4-dehydrogenase activity; GO:0047751,cholestenone 5-alpha-reductase activity; GO:0016491,oxidoreductase activity; GO:0050213,progesterone 5-alpha-reductase activity; GO:0016132,brassinosteroid biosynthetic process; GO:0090378,seed trichome elongation; GO:0090377,seed trichome initiation; GO:0003674,molecular_function; GO:…
44	Csa5G638340	transcriptional regulator; contains IPR003774 (Protein of unknown function UPF0301)	1.84793	3.78054e-07	2.73484e-05	up	5	26537811	26539115	K07735 putative transcriptional regulator | (RefSeq) UPF0301 protein BF2109-like (A)	--
45	Csa6G001220	CBL-interacting protein kinase 1; contains IPR004041 (NAF domain), IPR011009 (Protein kinase-like domain)	1.28707	0.000149422	0.00335819	up	6	162865	169271	K07198 5'-AMP-activated protein kinase, catalytic alpha subunit [EC:2.7.11.11] | (RefSeq) CBL-interacting serine/threonine-protein kinase 1 isoform X1 (A)	GO:0005737,cytoplasm; GO:0005634,nucleus; GO:0005886,plasma membrane; GO:0005524,ATP binding; GO:0106310,protein serine kinase activity; GO:0004674,protein serine/threonine kinase activity; GO:0106311,protein threonine kinase activity; GO:0035556,intracellular signal transduction; GO:0006468,protein phosphorylation; GO:0009737,response to abscisic acid; GO:0006970,response to osmotic stress; GO:0…
46	Csa6G084580	Disease resistance response protein; contains IPR004265 (Plant disease resistance response protein)	1.0726	0.00011705	0.00280057	up	6	5633165	5634034	K01870 isoleucyl-tRNA synthetase [EC:6.1.1.5] | (RefSeq) isoleucine--tRNA ligase, chloroplastic/mitochondrial-like (A)	GO:0048046,apoplast; GO:0005575,cellular_component; GO:0005576,extracellular region; GO:0110165,cellular anatomical entity
47	Csa6G401340	carboxylesterase 15; contains IPR013094 (Alpha/beta hydrolase fold-3)	1.52335	2.62797e-07	1.97835e-05	up	6	17877285	17878526	K14493 gibberellin receptor GID1 [EC:3.-.-.-] | (RefSeq) GID1b-2; hypothetical protein (A)	GO:0016787,hydrolase activity; GO:0080030,methyl indole-3-acetate esterase activity; GO:0003674,molecular_function; GO:0003824,catalytic activity; GO:0016788,hydrolase activity, acting on ester bonds; GO:0052689,carboxylic ester hydrolase activity
48	Csa6G486790	Ethylene-responsive transcription factor; contains IPR016177 (DNA-binding, integrase-type)	2.54294	0.0033641	0.0340808	up	6	22611683	22612960	K09286 EREBP-like factor | (RefSeq) ethylene-responsive transcription factor RAP2-6 isoform X1 (A)	GO:0005634,nucleus; GO:0003677,DNA binding; GO:0003700,DNA-binding transcription factor activity; GO:0009738,abscisic acid-activated signaling pathway; GO:0050832,defense response to fungus; GO:0009873,ethylene-activated signaling pathway; GO:0009788,negative regulation of abscisic acid-activated signaling pathway; GO:0009737,response to abscisic acid; GO:0009749,response to glucose; GO:0006970,r…
49	Csa6G495100	BTB/POZ and TAZ domain-containing protein 4; contains IPR000197 (Zinc finger, TAZ-type), IPR011333 (BTB/POZ fold)	1.13926	9.31053e-05	0.00234587	up	6	23975583	23978468	K04498 E1A/CREB-binding protein [EC:2.3.1.48] | (RefSeq) histone acetyltransferase HAC1-like isoform X1 (A)	GO:0005737,cytoplasm; GO:0005774,vacuolar membrane; GO:0005516,calmodulin binding; GO:0046872,metal ion binding; GO:0016567,protein ubiquitination; GO:0006355,regulation of transcription, DNA-templated; GO:0009733,response to auxin; GO:0009739,response to gibberellin; GO:0042542,response to hydrogen peroxide; GO:0009753,response to jasmonic acid; GO:0009751,response to salicylic acid; GO:0009651,…
50	Csa6G507370	Thiosulfate sulfurtransferase GlpE; contains IPR001763 (Rhodanese-like domain)	2.32318	1.47915e-05	0.000562472	up	6	26029306	26031016	K22547 arsenate reductase [EC:1.20.4.1] | (RefSeq) protein HIGH ARSENIC CONTENT 1, mitochondrial (A)	GO:0009507,chloroplast; GO:0009579,thylakoid; GO:0007568,aging; GO:0009753,response to jasmonic acid; GO:0006979,response to oxidative stress; GO:0009611,response to wounding; GO:0008150,biological_process; GO:0032502,developmental process; GO:0009719,response to endogenous stimulus; GO:0009725,response to hormone; GO:0010033,response to organic substance; GO:0033993,response to lipid; GO:0042221…
51	Csa7G020910	NAC domain protein,; contains IPR003441 (No apical meristem (NAM) protein)	1.27186	0.000114865	0.00275542	up	7	1188874	1190270	K00521 ferric-chelate reductase [EC:1.16.1.7] | (RefSeq) ferric reduction oxidase 7, chloroplastic-like (A)	GO:0005634,nucleus; GO:0003677,DNA binding; GO:0006355,regulation of transcription, DNA-templated; GO:0003674,molecular_function; GO:0003676,nucleic acid binding; GO:0005488,binding; GO:0097159,organic cyclic compound binding; GO:1901363,heterocyclic compound binding; GO:0006139,nucleobase-containing compound metabolic process; GO:0006351,transcription, DNA-templated; GO:0006725,cellular aromatic…
52	Csa7G219250	Unknown protein	1.18338	0.00448537	0.0415947	up	7	7833392	7833883	--	--
53	Csa7G407620	cDNA, clone: J100026I16, full insert sequence; contains IPR025322 (Protein of unknown function DUF4228)	1.34565	8.56169e-06	0.000353915	up	7	15707771	15708487	--	--
54	Csa7G452370	Histidine phosphotransfer protein; contains IPR008207 (Signal transduction histidine kinase, phosphotransfer (Hpt) domain)	1.30856	3.64037e-09	4.92087e-07	up	7	19065953	19067864	K14490 histidine-containing phosphotransfer peotein | (RefSeq) histidine-containing phosphotransfer protein 4 (A)	GO:0005737,cytoplasm; GO:0005829,cytosol; GO:0005634,nucleus; GO:0009927,histidine phosphotransfer kinase activity; GO:0043424,protein histidine kinase binding; GO:0009736,cytokinin-activated signaling pathway; GO:0000160,phosphorelay signal transduction system; GO:0016310,phosphorylation; GO:0003674,molecular_function; GO:0003824,catalytic activity; GO:0004672,protein kinase activity; GO:0016301…
55	novel.146	Unknown protein	1.60046	0.000398066	0.00710191	up	2	987625	988169	--	--
56	novel.147	Unknown protein	2.57288	2.12745e-16	1.40708e-13	up	2	994943	995850	--	--
57	novel.420	Unknown protein	1.13225	7.39275e-07	4.82065e-05	up	4	2041508	2043425	K13448 calcium-binding protein CML | (RefSeq) calmodulin-like protein 3 (A)	GO:0005777,peroxisome; GO:0005509,calcium ion binding; GO:0003674,molecular_function; GO:0005488,binding; GO:0043167,ion binding; GO:0043169,cation binding; GO:0046872,metal ion binding; GO:0005575,cellular_component; GO:0005622,intracellular anatomical structure; GO:0005737,cytoplasm; GO:0042579,microbody; GO:0043226,organelle; GO:0043227,membrane-bounded organelle; GO:0043229,intracellular orga…
58	novel.49	Unknown protein	1.11167	3.56327e-15	1.8597e-12	up	1	9035724	9037541	--	GO:0016021,integral component of membrane; GO:0005575,cellular_component; GO:0016020,membrane; GO:0031224,intrinsic component of membrane; GO:0110165,cellular anatomical entity
59	novel.526	Unknown protein	1.2079	0.000303443	0.00578134	up	4	19492882	19493453	--	--
60	novel.548	Unknown protein	1.95327	1.88074e-06	0.000106512	up	5	595513	597258	--	--

## Sheet: Table S7
Table S7. GO enrichment terms of differentially expressed genes (DEGs).
ID	Classification	# DEGS	pvalue	Up gene	Down gene
GO:0048046	Cellular component	223	0.00836739	3	5
GO:0009505	Cellular component	190	0.0434525	0	4
GO:0005887	Cellular component	223	0.167571	2	1
GO:0031461	Cellular component	223	0.338386	1	1
GO:0016469	Cellular component	16602	0.463621	0	1
GO:0080184	Biological process	188	0.00733041	2	0
GO:0006979	Biological process	188	1.91432e-05	2	4
GO:0000302	Biological process	188	0.000191783	3	2
GO:0001666	Biological process	188	0.000748569	2	4
GO:0042542	Biological process	188	5.28024e-06	2	2
GO:0016705	Molecular function	222	5.22082e-06	6	3
GO:0003993	Molecular function	222	0.00186039	2	1
GO:0043424	Molecular function	222	0.0433003	2	0
GO:0015144	Molecular function	222	0.044119	2	1
GO:0003987	Molecular function	222	0.0433003	1	1

## Sheet: Table S8
Table S8. KEGG enrichment pathways.
KEGG_pathway	ko_id	Cluster_frequency	Genome_frequency	P-value	Corrected_P-value	count	GeneID	KEGG Orthology	Up	Up_gene	Down	Down_gene
Phenylpropanoid biosynthesis	ko00940	10	263	0.0102603	0.841347	10	Csa6G013940;Csa7G058560;Csa7G061710;Csa6G504560;Csa2G406640;Csa7G414530;Csa2G068700;Csa2G070200;Csa1G611280;Csa7G073450	K00430+K00430+K00430+K00430+K00430+K00430+K00487+K00487+K01188+K23260	1	Csa1G611280	9	Csa6G013940;Csa7G058560;Csa7G061710;Csa6G504560;Csa2G406640;Csa7G414530;Csa2G068700;Csa2G070200;Csa7G073450
Plant hormone signal transduction	ko04075	17	612	0.0197917	1	17	Csa6G236080;Csa4G337890;Csa4G056700;Csa6G519630;Csa2G403160;Csa2G011450;Csa1G231530;Csa6G505810;Csa7G452370;Csa1G572420;Csa5G647320;Csa6G401340;Csa6G012800;Csa5G217670;Csa4G312880;novel.994;Csa3G622450	K13413+K13416+K13422+K14431+K14431+K14432+K14484+K14488+K14490+K14490+K14493+K14493+K14496+K14496+K14496+K14515+K16189	6	Csa6G236080;Csa2G403160;Csa7G452370;Csa1G572420;Csa5G647320;Csa6G401340	11	Csa4G337890;Csa4G056700;Csa6G519630;Csa2G011450;Csa1G231530;Csa6G505810;Csa6G012800;Csa5G217670;Csa4G312880;novel.994;Csa3G622450
Circadian rhythm - plant	ko04712	5	98	0.0212992	1	5	Csa3G736740;Csa5G341040;Csa1G032440;Csa4G124910;Csa1G033250	K12133+K12133+K12133+K12135+K16222	5	Csa3G736740;Csa5G341040;Csa1G032440;Csa4G124910;Csa1G033250	0	--
Flavonoid biosynthesis	ko00941	3	73	0.114956	1	3	Csa2G068700;Csa2G070200;Csa1G013190	K00487+K00487+K05280	1	Csa1G013190	2	Csa2G068700;Csa2G070200
Plant-pathogen interaction	ko04626	14	620	0.129186	1	14	Csa3G606870;Csa3G748160;Csa6G236080;Csa4G337890;Csa3G733880;Csa2G354950;Csa3G750890;Csa6G006890;Csa3G319280;novel.420;Csa2G014830;Csa2G361710;Csa1G501840;Csa4G496760	K05391+K05391+K13413+K13416+K13420+K13420+K13420+K13448+K13448+K13448+K13459+K15397+K15397+K18875	7	Csa6G236080;Csa2G354950;Csa3G319280;novel.420;Csa2G014830;Csa2G361710;Csa4G496760	7	Csa3G606870;Csa3G748160;Csa4G337890;Csa3G733880;Csa3G750890;Csa6G006890;Csa1G501840
Linoleic acid metabolism	ko00591	2	51	0.200474	1	2	Csa2G023870;novel.156	K15718+K15718	2	Csa2G023870;novel.156	0	--
Flavone and flavonol biosynthesis	ko00944	1	21	0.291136	1	1	Csa1G013190	K05280	1	Csa1G013190	0	--
Carbon metabolism	ko01200	6	296	0.34871	1	6	Csa6G324800;Csa1G617370;Csa5G167110;Csa6G497180;Csa4G280450;Csa5G598750	K00026+K00830+K00850+K01610+K01895+K14272	4	Csa6G324800;Csa1G617370;Csa6G497180;Csa4G280450	2	Csa5G167110;Csa5G598750
Isoflavonoid biosynthesis	ko00943	1	42	0.497985	1	1	Csa6G492230	K13260	0	--	1	Csa6G492230
Oxidative phosphorylation	ko00190	1	134	0.890512	1	1	Csa4G652690	K05573	0	--	1	Csa4G652690

## Sheet: Table S9
Table S9. Selected DEGs for transcription factors.
#	Gene IDs	Prediced functions	NR0d_vs_NR4d	NS0d_vs_NR0d	NS0d_vs_NS4d	NS4d_vs_NR4d	TFs
1	Csa2G403160	BZIP transcription factor; contains IPR004827 (Basic-leucine zipper domain), IPR025422 (DOG1 domain)	0	0	0	1.29183	bzip
2	Csa3G860320	BZIP transcription factor; contains IPR004827 (Basic-leucine zipper domain)	0	0	0	1.40169	bzip
3	Csa1G032440	Putative At5g37260-like protein; contains IPR009057 (Homeodomain-like)	0	0	-1.54078	1.40071	MYB
4	Csa1G033200	MYB transcription factor; contains IPR009057 (Homeodomain-like)	1.26191	0	0	1.62375	MYB
5	Csa1G071840	Putative MYB transcription factor; contains IPR009057 (Homeodomain-like)	0	0	-1.42574	2.1649	MYB
6	Csa1G586860	Putative MYB transcription factor; contains IPR009057 (Homeodomain-like)	0	0	-1.03316	1.06963	MYB
7	Csa2G361710	Transcription factor RADIALIS; contains IPR009057 (Homeodomain-like)	2.55568	0	0	1.51174	MYB
8	Csa3G736740	MYB transcription factor; contains IPR009057 (Homeodomain-like)	1.17782	0	0	1.44038	MYB
9	Csa4G638510	Putative MYB transcription factor; contains IPR009057 (Homeodomain-like)	0	0	-1.31246	1.05732	MYB
10	Csa5G341040	Putative At5g37260-like protein; contains IPR009057 (Homeodomain-like)	0	0	0	1.05436	MYB
11	Csa3G101810	NAC domain-containing protein, putative; contains IPR003441 (No apical meristem (NAM) protein)	0	0	0	1.62854	NAC
12	Csa3G379740	NAC domain protein,; contains IPR003441 (No apical meristem (NAM) protein)	1.68486	0	0	1.36161	NAC
13	Csa7G020910	NAC domain protein,; contains IPR003441 (No apical meristem (NAM) protein)	0	0	-1.68512	1.27186	NAC
14	Csa3G119700	Putative WRKY transcription factor 30; contains IPR003657 (DNA-binding WRKY)	-1.0621	0	-1.53847	0	WRKY
15	Csa3G710870	WRKY transcription factor 4; contains IPR003657 (DNA-binding WRKY)	0	0	-1.22515	0	WRKY
16	Csa3G730800	WRKY transcription factor 17; contains IPR003657 (DNA-binding WRKY)	0	0	-1.09179	0	WRKY
17	Csa6G363560	WRKY transcription factor, putative; contains IPR003657 (DNA-binding WRKY)	-1.6516	0	-1.11639	0	WRKY
18	Csa6G486960	WRKY transcription factor, putative; contains IPR003657 (DNA-binding WRKY)	0	0	-1.01036	0	WRKY

## Sheet: Table S10 
Table S10. Correlation network of DEGs and DAMs in Phenolic Acids.
geneID	Count	Annotation	metaID	Phenolic acids	coefficient	pvalue
Csa1G043010		Hydrolase, alpha/beta fold family protein; contains IPR022742 (Alpha/beta hydrolase, N-terminal)	Jmwn006041	(7S,8R)-dehydrodiconiferylalcohol-9'-O-β-D-glucopyranoside	0.886138	0.000124135
Csa1G070620		Serine/threonine-protein kinase; contains IPR000742 (Epidermal growth factor-like domain), IPR000858 (S-locus glycoprotein), IPR001480 (Bulb-type lectin domain), IPR003609 (Apple-like), IPR011009 (Protein kinase-like domain), IPR013320 (Concanavalin A-like lectin/glucanase, subgroup), IPR021820 (S-locus receptor kinase, C-terminal)	Jmwn006041	(7S,8R)-dehydrodiconiferylalcohol-9'-O-β-D-glucopyranoside	0.949157	2.45609e-06
Csa1G420340		1-deoxy-D-xylulose-5-phosphate synthase; contains IPR005477 (Deoxyxylulose-5-phosphate synthase), IPR009014 (Transketolase, C-terminal/Pyruvate-ferredoxin oxidoreductase, domain II)	Jmwn006041	(7S,8R)-dehydrodiconiferylalcohol-9'-O-β-D-glucopyranoside	0.976209	5.76761e-08
Csa1G586860		Putative MYB transcription factor; contains IPR009057 (Homeodomain-like)	Jmwn006041	(7S,8R)-dehydrodiconiferylalcohol-9'-O-β-D-glucopyranoside	0.844361	0.000550464
Csa4G648590		Putative uncharacterized protein OSJNBa0014K08.16; contains IPR012876 (Protein of unknown function DUF1677, plant)	Jmwn006041	(7S,8R)-dehydrodiconiferylalcohol-9'-O-β-D-glucopyranoside	0.847481	0.000500214
Csa6G084580		Disease resistance response protein; contains IPR004265 (Plant disease resistance response protein)	Jmwn006041	(7S,8R)-dehydrodiconiferylalcohol-9'-O-β-D-glucopyranoside	0.887041	0.00011948
Csa7G407620		cDNA, clone: J100026I16, full insert sequence; contains IPR025322 (Protein of unknown function DUF4228)	Jmwn006041	(7S,8R)-dehydrodiconiferylalcohol-9'-O-β-D-glucopyranoside	0.906476	4.80773e-05
Csa7G452370		Histidine phosphotransfer protein; contains IPR008207 (Signal transduction histidine kinase, phosphotransfer (Hpt) domain)	Jmwn006041	(7S,8R)-dehydrodiconiferylalcohol-9'-O-β-D-glucopyranoside	0.91535	2.9655e-05
Csa1G043010		Hydrolase, alpha/beta fold family protein; contains IPR022742 (Alpha/beta hydrolase, N-terminal)	Hmsn002948	2-Hydroxyphenol-1-O-glucosyl(6→1)rhamnoside	0.801336	0.00172727
Csa1G066520		BTB/POZ domain-containing protein; contains IPR011333 (BTB/POZ fold), IPR027356 (NPH3 domain)	Hmsn002948	2-Hydroxyphenol-1-O-glucosyl(6→1)rhamnoside	0.930603	1.12736e-05
Csa1G070620		Serine/threonine-protein kinase; contains IPR000742 (Epidermal growth factor-like domain), IPR000858 (S-locus glycoprotein), IPR001480 (Bulb-type lectin domain), IPR003609 (Apple-like), IPR011009 (Protein kinase-like domain), IPR013320 (Concanavalin A-like lectin/glucanase, subgroup), IPR021820 (S-locus receptor kinase, C-terminal)	Hmsn002948	2-Hydroxyphenol-1-O-glucosyl(6→1)rhamnoside	0.919012	2.39222e-05
Csa1G420340		1-deoxy-D-xylulose-5-phosphate synthase; contains IPR005477 (Deoxyxylulose-5-phosphate synthase), IPR009014 (Transketolase, C-terminal/Pyruvate-ferredoxin oxidoreductase, domain II)	Hmsn002948	2-Hydroxyphenol-1-O-glucosyl(6→1)rhamnoside	0.862463	0.000306269
Csa2G403160		BZIP transcription factor; contains IPR004827 (Basic-leucine zipper domain), IPR025422 (DOG1 domain)	Hmsn002948	2-Hydroxyphenol-1-O-glucosyl(6→1)rhamnoside	0.8837	5.92394e-05
Csa4G638510		MYB transcription factor; contains IPR009057 (Homeodomain-like)	Hmsn002948	2-Hydroxyphenol-1-O-glucosyl(6→1)rhamnoside	0.8761	5.92394e-05
Csa4G648590		Putative uncharacterized protein OSJNBa0014K08.16; contains IPR012876 (Protein of unknown function DUF1677, plant)	Hmsn002948	2-Hydroxyphenol-1-O-glucosyl(6→1)rhamnoside	0.902349	5.92394e-05
Csa6G084580		Disease resistance response protein; contains IPR004265 (Plant disease resistance response protein)	Hmsn002948	2-Hydroxyphenol-1-O-glucosyl(6→1)rhamnoside	0.880676	0.000155419
Csa7G407620		cDNA, clone: J100026I16, full insert sequence; contains IPR025322 (Protein of unknown function DUF4228)	Hmsn002948	2-Hydroxyphenol-1-O-glucosyl(6→1)rhamnoside	0.841106	0.000606966
Csa7G452370		Histidine phosphotransfer protein; contains IPR008207 (Signal transduction histidine kinase, phosphotransfer (Hpt) domain)	Hmsn002948	2-Hydroxyphenol-1-O-glucosyl(6→1)rhamnoside	0.945484	3.45945e-06
Csa4G638510		MYB transcription factor; contains IPR009057 (Homeodomain-like)	Cmsp002787	3,4'-Dihydroxy-3',5'-dimethoxypropiophenone	0.807245	0.0015011
Csa1G420340		Putative uncharacterized protein OSJNBa0014K08.16; contains IPR012876 (Protein of unknown function DUF1677, plant)	Cmsp002787	3,4'-Dihydroxy-3',5'-dimethoxypropiophenone	0.805615	0.00156107
Csa7G452370		Histidine phosphotransfer protein; contains IPR008207 (Signal transduction histidine kinase, phosphotransfer (Hpt) domain)	Cmsp002787	3,4'-Dihydroxy-3',5'-dimethoxypropiophenone	0.823256	0.0010013
Csa1G066520		BTB/POZ domain-containing protein; contains IPR011333 (BTB/POZ fold), IPR027356 (NPH3 domain)	Lhdp112405	Bis(2-ethylhexyl)phthalate*	0.822531	0.00102067
Csa1G070620		Serine/threonine-protein kinase; contains IPR000742 (Epidermal growth factor-like domain), IPR000858 (S-locus glycoprotein), IPR001480 (Bulb-type lectin domain), IPR003609 (Apple-like), IPR011009 (Protein kinase-like domain), IPR013320 (Concanavalin A-like lectin/glucanase, subgroup), IPR021820 (S-locus receptor kinase, C-terminal)	Lhdp112405	Bis(2-ethylhexyl)phthalate*	0.812254	0.00132782
Csa1G288020		WAT1-related protein; contains IPR000620 (Drug/metabolite transporter)	Lhdp112405	Bis(2-ethylhexyl)phthalate*	0.839587	0.000634828
Csa1G420340		1-deoxy-D-xylulose-5-phosphate synthase; contains IPR005477 (Deoxyxylulose-5-phosphate synthase), IPR009014 (Transketolase, C-terminal/Pyruvate-ferredoxin oxidoreductase, domain II)	Lhdp112405	Bis(2-ethylhexyl)phthalate*	0.83533	0.000718205
Csa1G586860		Putative MYB transcription factor; contains IPR009057 (Homeodomain-like)	Lhdp112405	Bis(2-ethylhexyl)phthalate*	0.822531	0.00102067
Csa2G403160		BZIP transcription factor; contains IPR004827 (Basic-leucine zipper domain), IPR025422 (DOG1 domain)	Lhdp112405	Bis(2-ethylhexyl)phthalate*	0.813547	0.0012857
Csa4G075200		Gibberellin 2-oxidase; contains IPR002283 (Isopenicillin N synthase), IPR026992 (Non-haem dioxygenase N-terminal domain), IPR027443 (Isopenicillin N synthase-like)	Lhdp112405	Bis(2-ethylhexyl)phthalate*	0.813547	0.0012857
Csa6G001220		CBL-interacting protein kinase 1; contains IPR004041 (NAF domain), IPR011009 (Protein kinase-like domain)	Lhdp112405	Bis(2-ethylhexyl)phthalate*	0.822669	0.00101696
Csa1G066520		BTB/POZ domain-containing protein; contains IPR011333 (BTB/POZ fold), IPR027356 (NPH3 domain)	Lmmp010562	Diisooctyl Phthalate*	0.819755	0.00109757
Csa1G070620		Serine/threonine-protein kinase; contains IPR000742 (Epidermal growth factor-like domain), IPR000858 (S-locus glycoprotein), IPR001480 (Bulb-type lectin domain), IPR003609 (Apple-like), IPR011009 (Protein kinase-like domain), IPR013320 (Concanavalin A-like lectin/glucanase, subgroup), IPR021820 (S-locus receptor kinase, C-terminal)	Lmmp010562	Diisooctyl Phthalate*	0.81431	0.00126132
Csa1G288020		WAT1-related protein; contains IPR000620 (Drug/metabolite transporter)	Lmmp010562	Diisooctyl Phthalate*	0.8378	0.000668864
Csa1G420340		1-deoxy-D-xylulose-5-phosphate synthase; contains IPR005477 (Deoxyxylulose-5-phosphate synthase), IPR009014 (Transketolase, C-terminal/Pyruvate-ferredoxin oxidoreductase, domain II)	Lmmp010562	Diisooctyl Phthalate*	0.832618	0.000775582
Csa1G586860		CBL-interacting protein kinase 1; contains IPR004041 (NAF domain), IPR011009 (Protein kinase-like domain)	Lmmp010562	Diisooctyl Phthalate*	0.832618	0.000775582
Csa2G403160		BZIP transcription factor; contains IPR004827 (Basic-leucine zipper domain), IPR025422 (DOG1 domain)	Lmmp010562	Diisooctyl Phthalate*	0.8378	0.000668864
Csa4G075200		Gibberellin 2-oxidase; contains IPR002283 (Isopenicillin N synthase), IPR026992 (Non-haem dioxygenase N-terminal domain), IPR027443 (Isopenicillin N synthase-like)	Lmmp010562	Diisooctyl Phthalate*	0.815284	0.00123076
Csa6G001220		CBL-interacting protein kinase 1; contains IPR004041 (NAF domain), IPR011009 (Protein kinase-like domain)	Lmmp010562	Diisooctyl Phthalate*	0.831216	0.000806596
Csa1G043010		Hydrolase, alpha/beta fold family protein; contains IPR022742 (Alpha/beta hydrolase, N-terminal)	Lmmn001294	Koaburaside	0.871606	0.000220644
Csa1G066520		BTB/POZ domain-containing protein; contains IPR011333 (BTB/POZ fold), IPR027356 (NPH3 domain)	Lmmn001294	Koaburaside	0.91718	2.66698e-05
Csa1G070620		Serine/threonine-protein kinase; contains IPR000742 (Epidermal growth factor-like domain), IPR000858 (S-locus glycoprotein), IPR001480 (Bulb-type lectin domain), IPR003609 (Apple-like), IPR011009 (Protein kinase-like domain), IPR013320 (Concanavalin A-like lectin/glucanase, subgroup), IPR021820 (S-locus receptor kinase, C-terminal)	Lmmn001294	Koaburaside	0.935412	7.93763e-06
Csa1G420340		1-deoxy-D-xylulose-5-phosphate synthase; contains IPR005477 (Deoxyxylulose-5-phosphate synthase), IPR009014 (Transketolase, C-terminal/Pyruvate-ferredoxin oxidoreductase, domain II)	Lmmn001294	Koaburaside	0.960689	6.92057e-07
Csa4G648590		Putative uncharacterized protein OSJNBa0014K08.16; contains IPR012876 (Protein of unknown function DUF1677, plant)	Lmmn001294	Koaburaside	0.854223	0.000403783
Csa7G407620		cDNA, clone: J100026I16, full insert sequence; contains IPR025322 (Protein of unknown function DUF4228)	Lmmn001294	Koaburaside	0.899634	6.76264e-05
Csa7G452370		Histidine phosphotransfer protein; contains IPR008207 (Signal transduction histidine kinase, phosphotransfer (Hpt) domain)	Lmmn001294	Koaburaside	0.910146	3.96068e-05
Csa1G043010		Hydrolase, alpha/beta fold family protein; contains IPR022742 (Alpha/beta hydrolase, N-terminal)	Wmmp000110	mudanoside A	0.884547	0.000132683
Csa1G066520		BTB/POZ domain-containing protein; contains IPR011333 (BTB/POZ fold), IPR027356 (NPH3 domain)	Wmmp000110	mudanoside A	0.936771	7.1531e-06
Csa1G070620		Serine/threonine-protein kinase; contains IPR000742 (Epidermal growth factor-like domain), IPR000858 (S-locus glycoprotein), IPR001480 (Bulb-type lectin domain), IPR003609 (Apple-like), IPR011009 (Protein kinase-like domain), IPR013320 (Concanavalin A-like lectin/glucanase, subgroup), IPR021820 (S-locus receptor kinase, C-terminal)	Wmmp000110	mudanoside A	0.948062	2.72706e-06
Csa1G420340		1-deoxy-D-xylulose-5-phosphate synthase; contains IPR005477 (Deoxyxylulose-5-phosphate synthase), IPR009014 (Transketolase, C-terminal/Pyruvate-ferredoxin oxidoreductase, domain II)	Wmmp000110	mudanoside A	0.969213	2.06842e-07
Csa2G403160		BZIP transcription factor; contains IPR004827 (Basic-leucine zipper domain), IPR025422 (DOG1 domain)	Wmmp000110	mudanoside A	0.870483	0.000230017
Csa4G648590		Putative uncharacterized protein OSJNBa0014K08.16; contains IPR012876 (Protein of unknown function DUF1677, plant)	Wmmp000110	mudanoside A	0.840681	0.000614664
Csa7G407620		cDNA, clone: J100026I16, full insert sequence; contains IPR025322 (Protein of unknown function DUF4228)	Wmmp000110	mudanoside A	0.908808	4.25452e-05
Csa7G452370		Histidine phosphotransfer protein; contains IPR008207 (Signal transduction histidine kinase, phosphotransfer (Hpt) domain)	Wmmp000110	mudanoside A	0.90976	4.04366e-05

[truncated: 1 more sheets: Table S11 ]
